# Supplementary material for: One-Pot Bi-Enzymatic Cascade Synthesis of Novel Ganoderma Triterpenoid Saponins
Source: MDPI journal article supplement (doi:10.3390/catal11050580), 2021-04-30
Supplement: s1 [file s1]

# Supplementary Materials: One-pot Bi-enzymatic Cascade Synthesis of Novel Ganoderma Triterpenoid Saponins

Te-Sheng Chang <sup>1,+,\*</sup>, Chien-Min Chiang <sup>2,+</sup>, Tzi-Yuan Wang <sup>3</sup>, Yu-Li Tsai <sup>1</sup>, Yu-Wei Wu <sup>4,5</sup>, Huei-Ju Ting <sup>1,\*</sup>  
and Jiumn-Yih Wu <sup>6,\*</sup>

**Table S1.** NMR spectroscopic data for GAA-G2 (in pyridine-*d*<sub>5</sub>; 700MHz).

| Compound         |      | $\delta_c$ , | GAA-G2                       | HMBC                                      |
|------------------|------|--------------|------------------------------|-------------------------------------------|
| Position         | type |              | $\delta_H$ ( <i>J</i> in Hz) |                                           |
| GAA moiety       |      |              |                              |                                           |
| 1                | CH2  | 36.2         | 3.12, m                      | H-2, H-19                                 |
|                  |      |              | 1.52, m                      |                                           |
| 2                | CH2  | 34.7         | 2.56, m                      | H-1                                       |
|                  |      |              | 2.52, m                      |                                           |
| 3                | C    | 215.9        |                              | H-1, H-2, H-28, H-29                      |
| 4                | C    | 46.8         |                              | H-5, H-6, H-28, H-29                      |
| 5                | CH   | 49.1         | 1.71, dd (13.4, 2.1)         | H-1, H-6, H-19, H-28, H-29                |
| 6                | CH2  | 30.6         | 2.12, m                      | H-5, H-7                                  |
|                  |      |              | 1.97, m                      |                                           |
| 7                | CH   | 67.1         | 5.17 dd (9.8, 7.5)           | H-5, H-6                                  |
| 8                | C    | 161.9        |                              | H-6, H-7, H-15, H-30                      |
| 9                | C    | 140.7        |                              | H-1, H-5, H-7, H-12, H-19                 |
| 10               | C    | 38.1         |                              | H-1, H-2, H-5, H-6, H-19                  |
| 11               | C    | 199.3        |                              | H-12                                      |
| 12               | CH2  | 52.1         | 2.88, d (16.4)               | H-18                                      |
|                  |      |              | 2.64, d (16.3)               |                                           |
| 13               | C    | 46.3         |                              | H-12, H-17, H-18, H-30                    |
| 14               | C    | 54.2         |                              | H-12, H-15, H-16, H-18, H-30              |
| 15               | CH   | 82.7         | 5.34, dd (9.4, 6.3)          | H-14, H-30, <b>Glc1-H-1'</b>              |
| 16               | CH2  | 35.7         | 2.50, m                      | H-17                                      |
|                  |      |              | 1.96, m                      |                                           |
| 17               | CH   | 49.2?        | 1.81, q (10.2)               | H-12, H-16, H-18, H-21, H-22              |
| 18               | CH3  | 17.7         | 1.09, s                      | H-12, H-17                                |
| 19               | CH3  | 18.9         | 1.43, s                      | H-1, H-5                                  |
| 20               | CH   | 32.9         | 2.16, m                      | H-16, H-17, H-21, H-22                    |
| 21               | CH3  | 19.6         | 0.91, d (5.8)                | H-22                                      |
| 22               | CH2  | 49.9         | 2.51, m                      | H-17, H-21                                |
|                  |      |              | 2.18, m                      |                                           |
| 23               | C    | 209.0        |                              | H-22, H-24, H-25                          |
| 24               | CH2  | 47.0         | 3.03, dd (17.6, 8.4)         | H-25, H-27                                |
|                  |      |              | 2.54, m                      |                                           |
| 25               | CH   | 35.6         | 3.26, m                      | H-24, H-27                                |
| 26               | C    | 178.2        |                              | H-24, H-25, H-27                          |
| 27               | CH3  | 17.6         | 1.33, d (7.2)                | H-24, H-25                                |
| 28               | CH3  | 26.8         | 1.07, s                      | H-5, H-29                                 |
| 29               | CH3  | 20.9         | 1.07, s                      | H-5, H-28                                 |
| 30               | CH3  | 21.9         | 1.46, s                      | H-15                                      |
| Glucose 1 moiety |      |              |                              |                                           |
| 1'               | CH   | 105.0        | 4.86, d (7.9)                | <b>H-15</b> , H-2', H-3', H-5'            |
| 2'               | CH   | 75.2         | 4.01, t (8.2)                | H-3' , H-5'                               |
| 3'               | CH   | 78.1         | 4.29, m                      | H-1', H-2' , H-4', H-5'                   |
| 4'               | CH   | 81.2         | 4.30, m                      | H2', H-3' , H-5', H-6', <b>Glc2-H-1''</b> |
| 5'               | CH   | 76.7         | 3.77, m                      | H-1', H-2', H-4', H-6'                    |
| 6'               | CH2  | 61.9         | 4.42 d (3.2), 2H             | H-4', H-5'                                |
| Glucose 2 moiety |      |              |                              |                                           |
| 1''              | CH   | 103.0        | 5.88, d(3.9)                 | <b>Glc1-H-4'</b> , H-3''                  |
| 2''              | CH   | 74.3         | 4.16, dd (9.6, 3.8)          | H-3''                                     |
| 3''              | CH   | 75.29        | 4.55, m                      | H-1'', H-2'', H-4''                       |
| 4''              | CH   | 71.8         | 4.13, t (9.4)                | H-3'', H-6''                              |
| 5''              | CH   | 75.30        | 4.55, m                      | H-2'', H-4'', H-6''                       |
| 6''              | CH2  | 62.6         | 4.52, m                      | H-4'', H-5''                              |
|                  |      |              | 4.31, m                      |                                           |

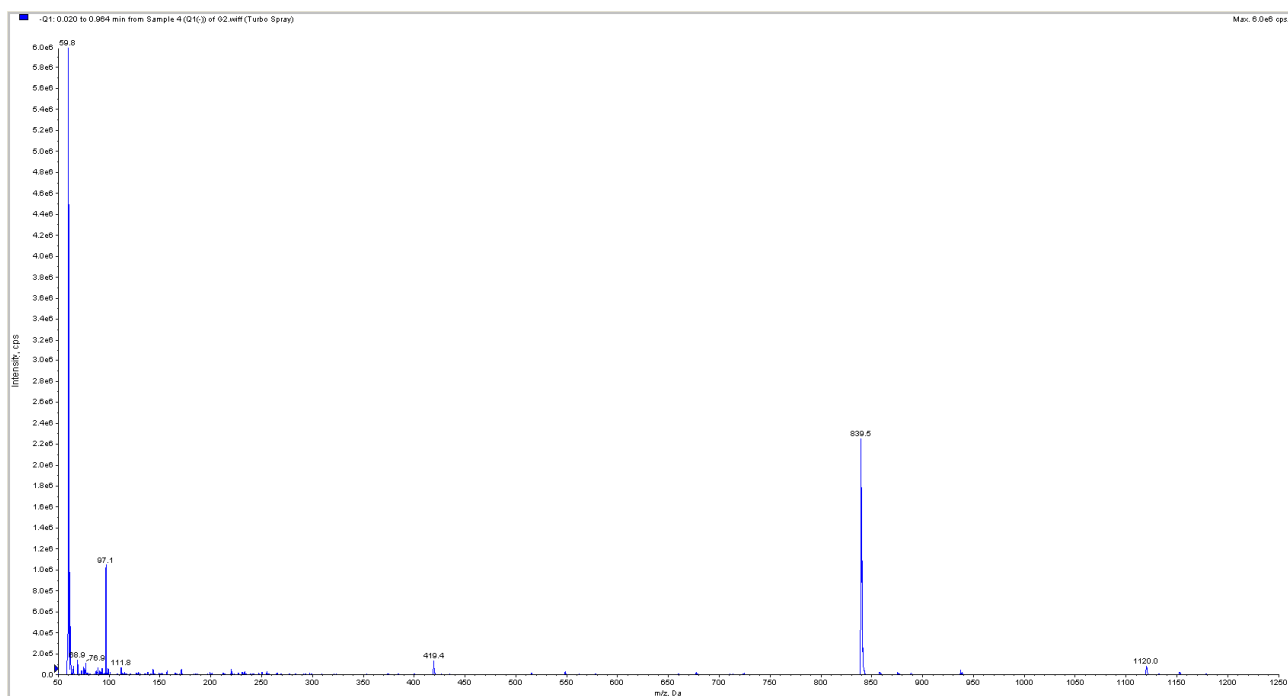

**Figure S1.** Mass analysis of GAA-G2 at the negative mode. A significant signal at m/z 839.5 showed the corresponding m/z signal of molecular weight 840 of GAA-diglucoside ( $516 + 180 \times 2 - 18 \times 2$ ) at the negative mode  $[GAA-G2 - H]^-$ .

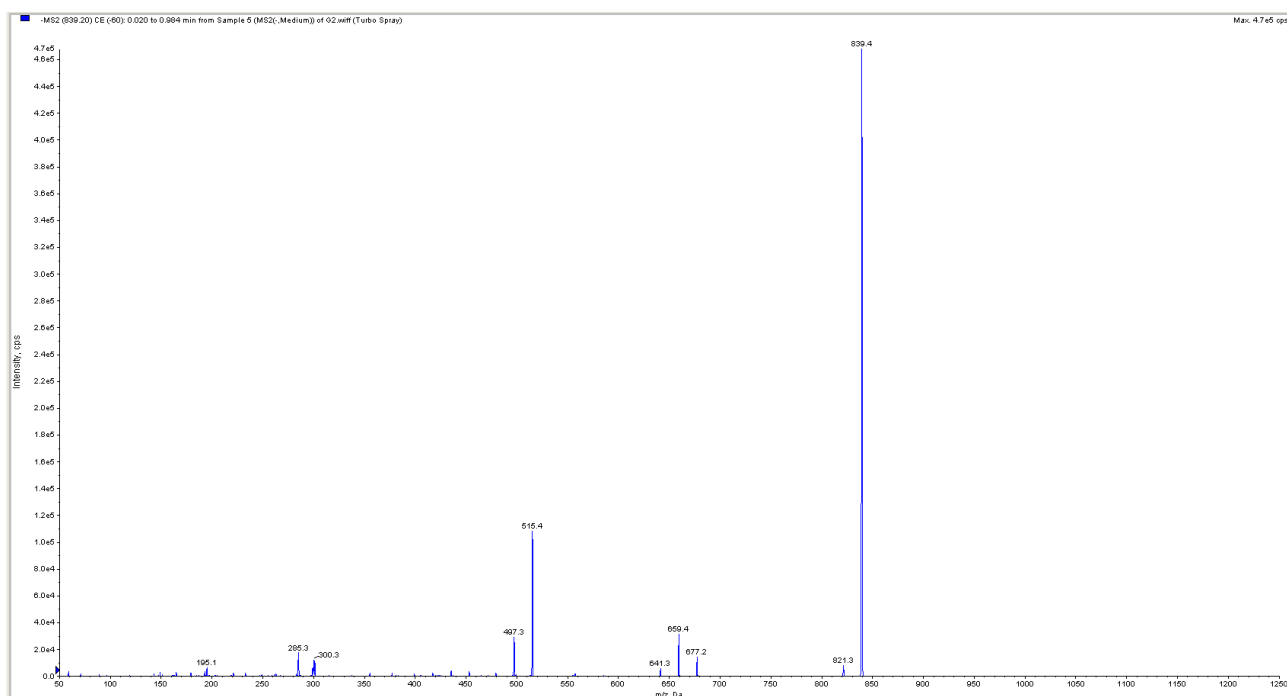

**Figure S2.** Mass-mass analysis of the m/z 839.5 peak of GAA-G2 at the negative mode. Two significant peaks at m/z 677.2 and 515.4 showed the corresponding m/z signals of molecular weights 678 and 516 of GAA-glucoside (516+180-18) and GAA (516) at the negative mode [GAA-G – H]<sup>-</sup> and [GAA – H]<sup>-</sup>.

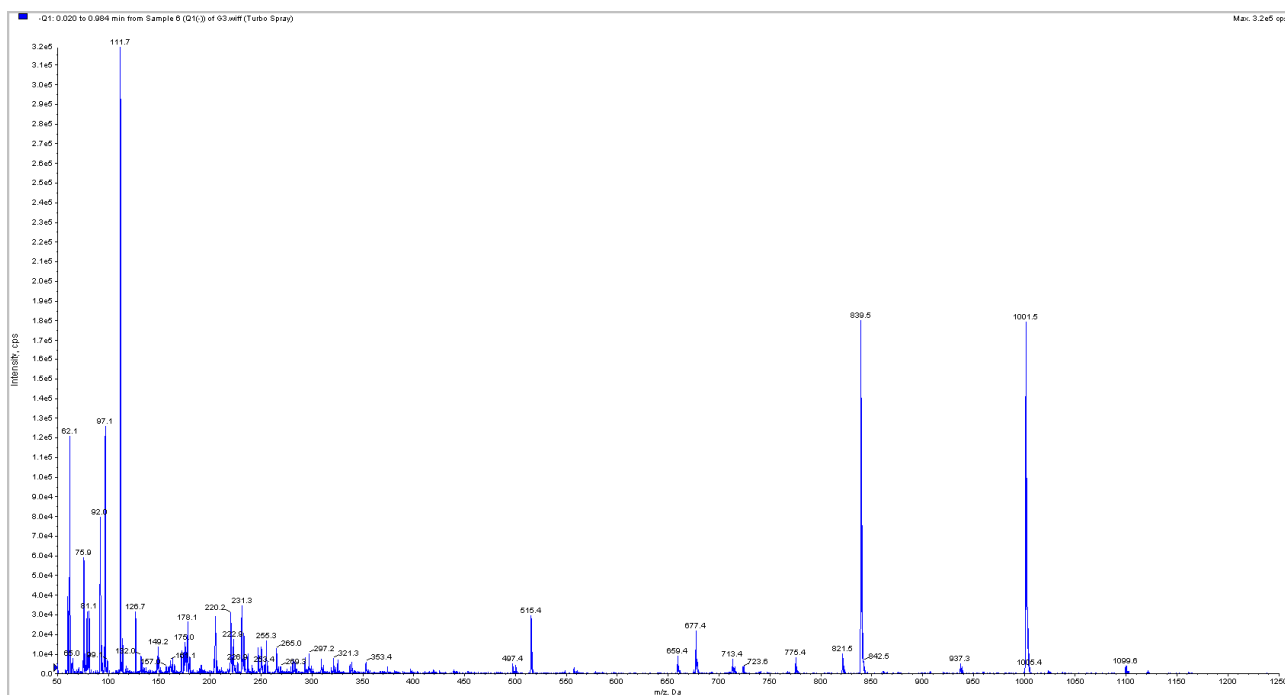

**Figure S3.** Mass analysis of GAA-G3 at the negative mode. A significant signal at m/z 1001.5 showed the corresponding m/z signal of molecular weight 1002 of GAA-triglucoside ( $516+180 \times 3-18 \times 3$ ) at the negative mode  $[\text{GAA-G3} - \text{H}]^-$ .

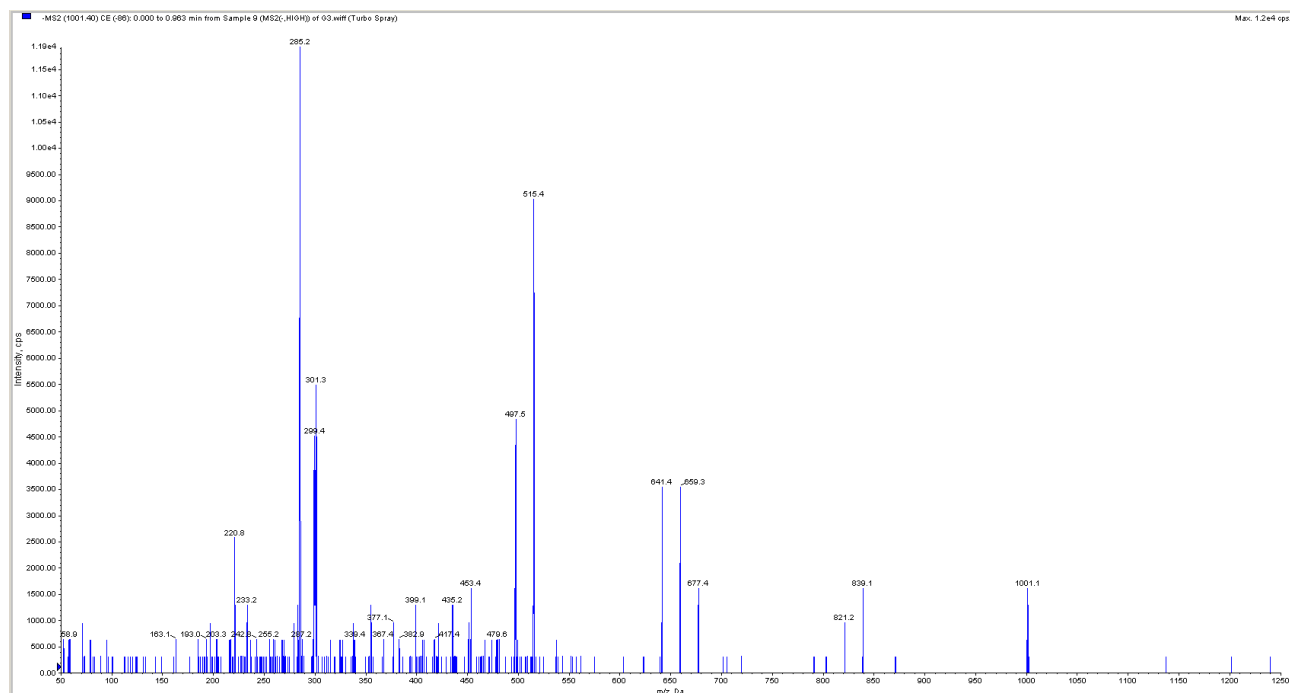

**Figure S4.** Mass-mass analysis of the m/z 1001.5 peak of GAA-G3 at the negative mode. Three significant peaks at m/z 839.1, 677.4 and 515.4 showed the corresponding m/z signals of molecular weights 840, 678 and 516 of GAA-diglucoside ( $516+180 \times 2-18 \times 2$ ), GAA-glucoside ( $516+180-18$ ) and GAA (516) at the negative mode  $[GAA-2G-H]^-$ ,  $[GAA-G-H]^-$  and  $[GAA-H]^-$ .

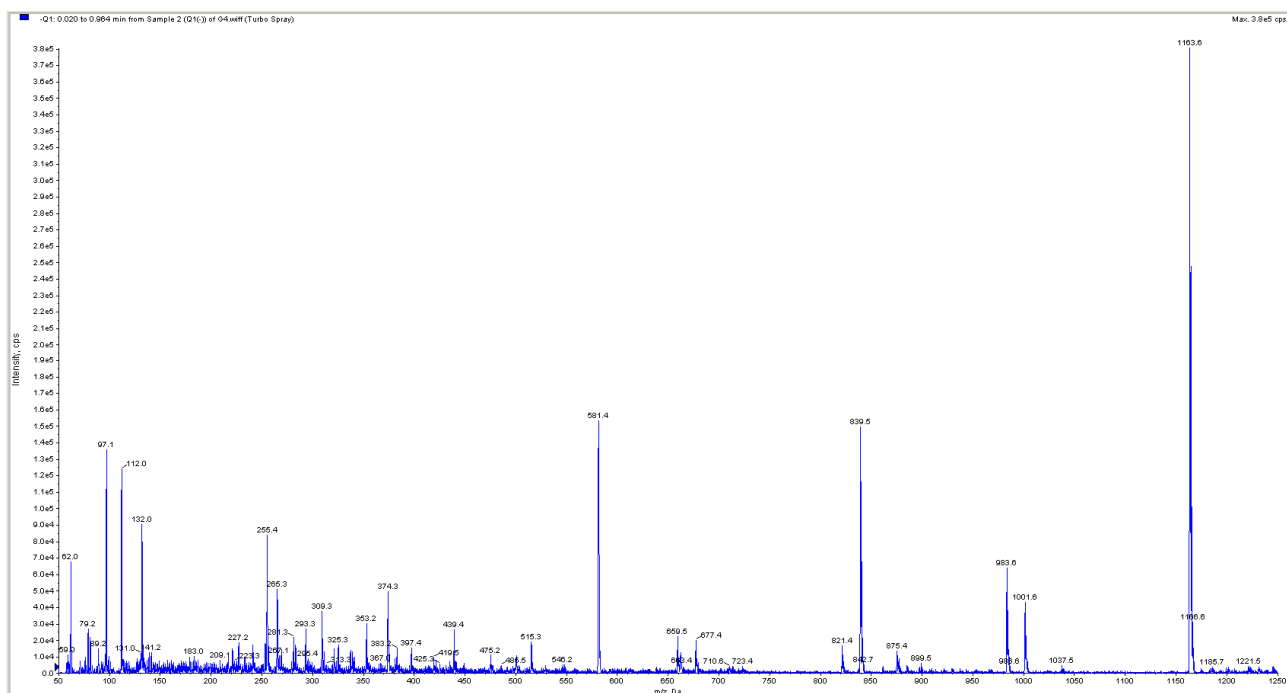

**Figure S5.** Mass analysis of GAA-G4 at the negative mode. A significant signal at  $m/z$  1163.6 showed the corresponding  $m/z$  signal of molecular weight 1164 of GAA-tetraglucoside ( $516+180 \times 4-18 \times 4$ ) at the negative mode [GAA-G4 - H].

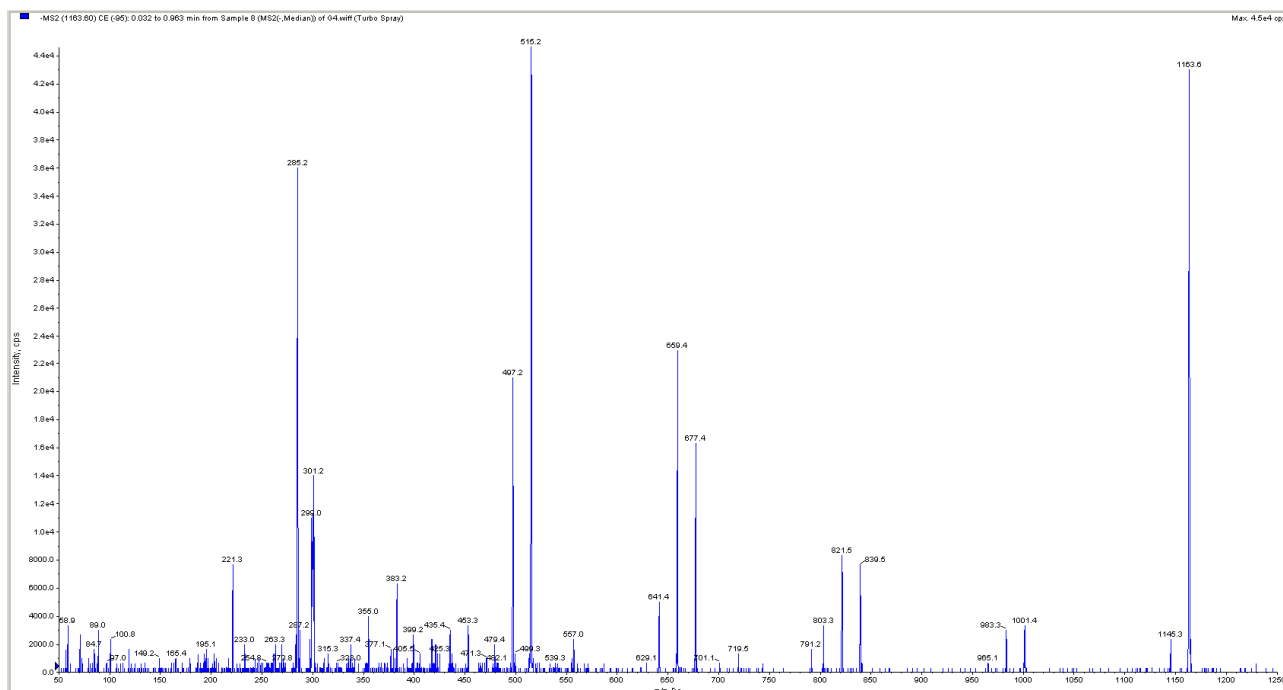

**Figure S6.** Mass-mass analysis of the m/z 1163.6 peak of GAA-G4 at the negative mode. Three significant peaks at m/z 1001.4, 839.5, 677.4 and 515.2 showed the corresponding m/z signals of molecular weights 1002, 840, 678 and 516 of GAA-triglucoside ( $516+180 \times 3-18 \times 3$ ), GAA-diglucoside ( $516+180 \times 2-18 \times 2$ ), GAA-glucoside ( $516+180-18$ ) and GAA (516) at the negative mode  $[GAA-3G-H]^-$ ,  $[GAA-2G-H]^-$ ,  $[GAA-G-H]^-$  and  $[GAA-H]^-$ .



GAA-G2, Pyr-d5, 1H

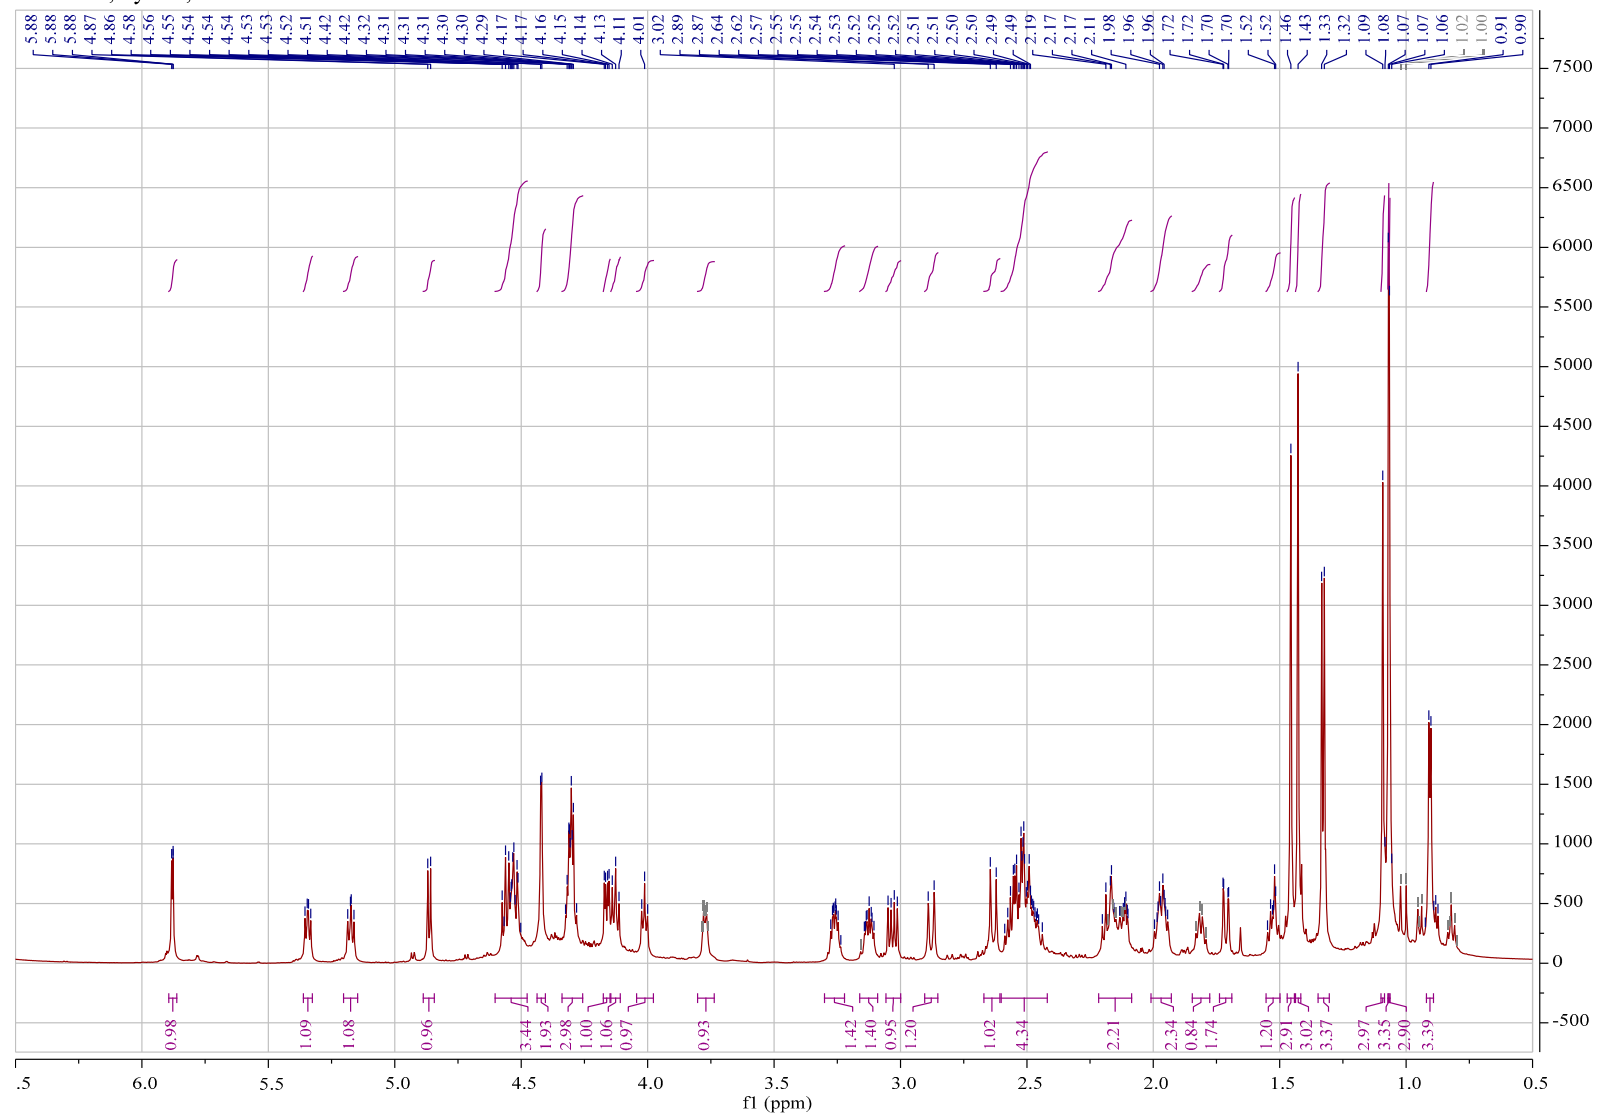

**Figure S7.** The  $^1\text{H}$ -NMR (700 MHz) spectrum of GAA-G2 in pyridine- $\text{d}_5$ .

GAA-G2, pyridine-d<sub>5</sub>, <sup>13</sup>C

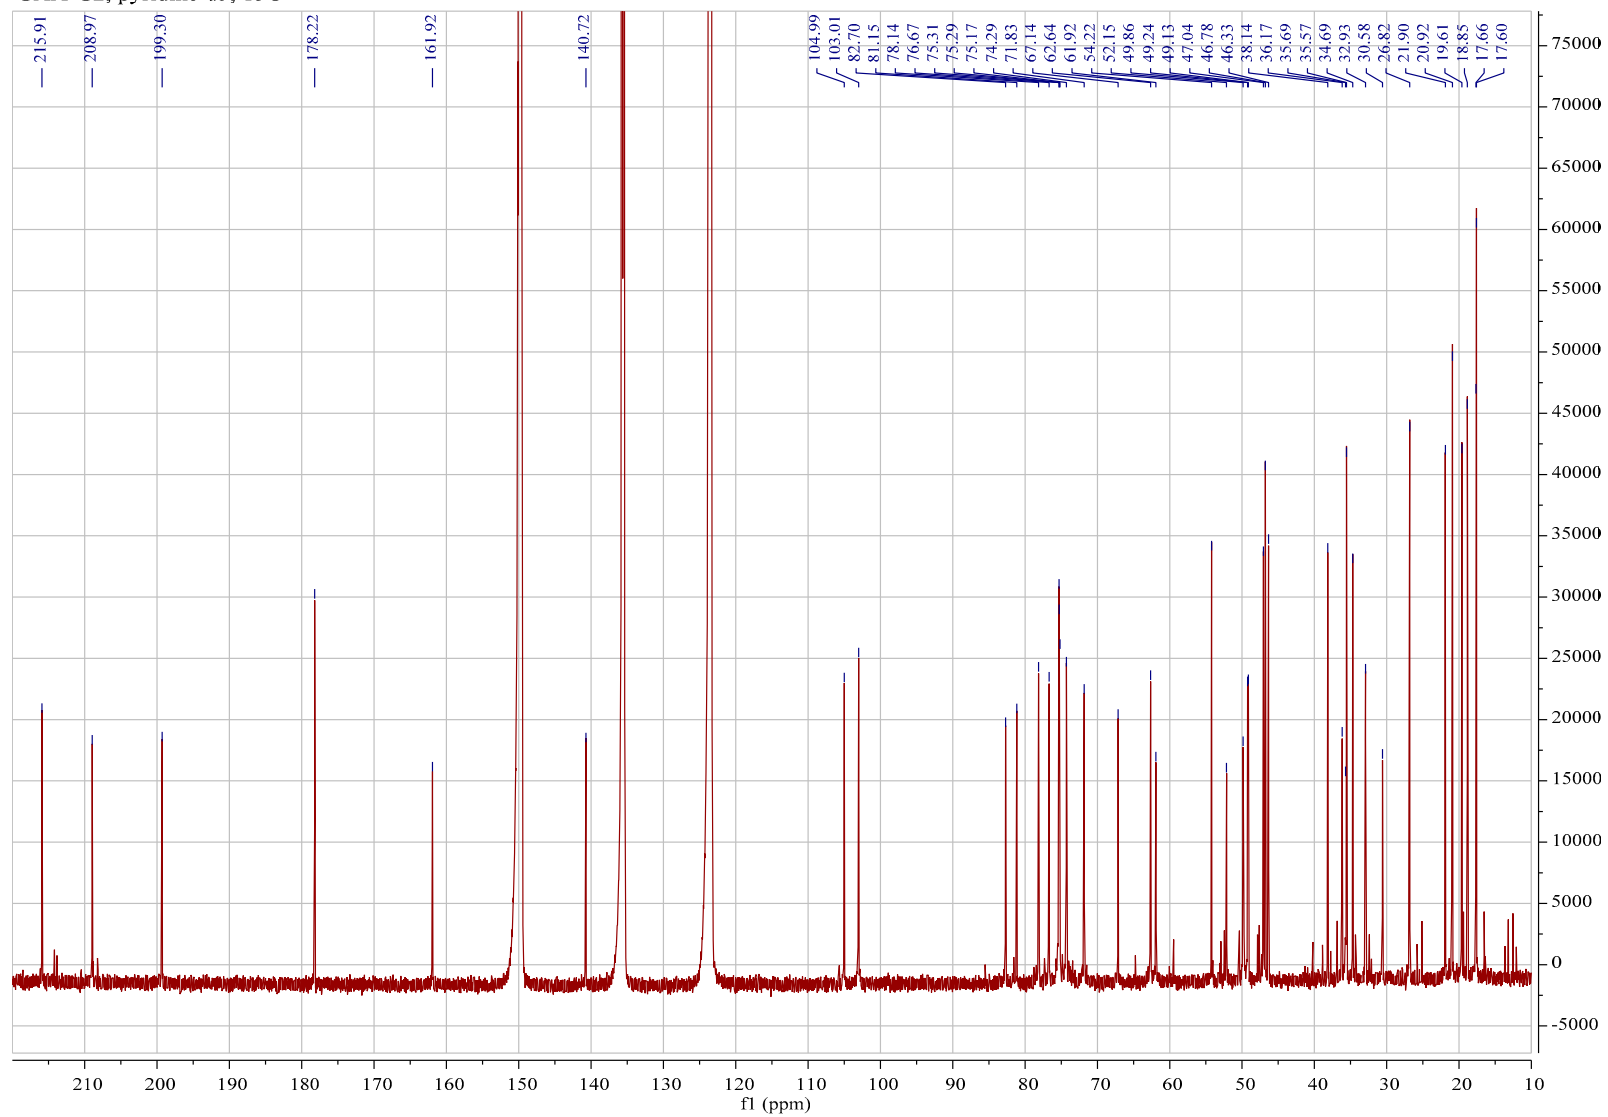

**Figure S8.** The <sup>13</sup>C-NMR (176 MHz) spectrum of GAA-G2 in pyridine-d<sub>5</sub>.

Dept-135, pyridine-d5

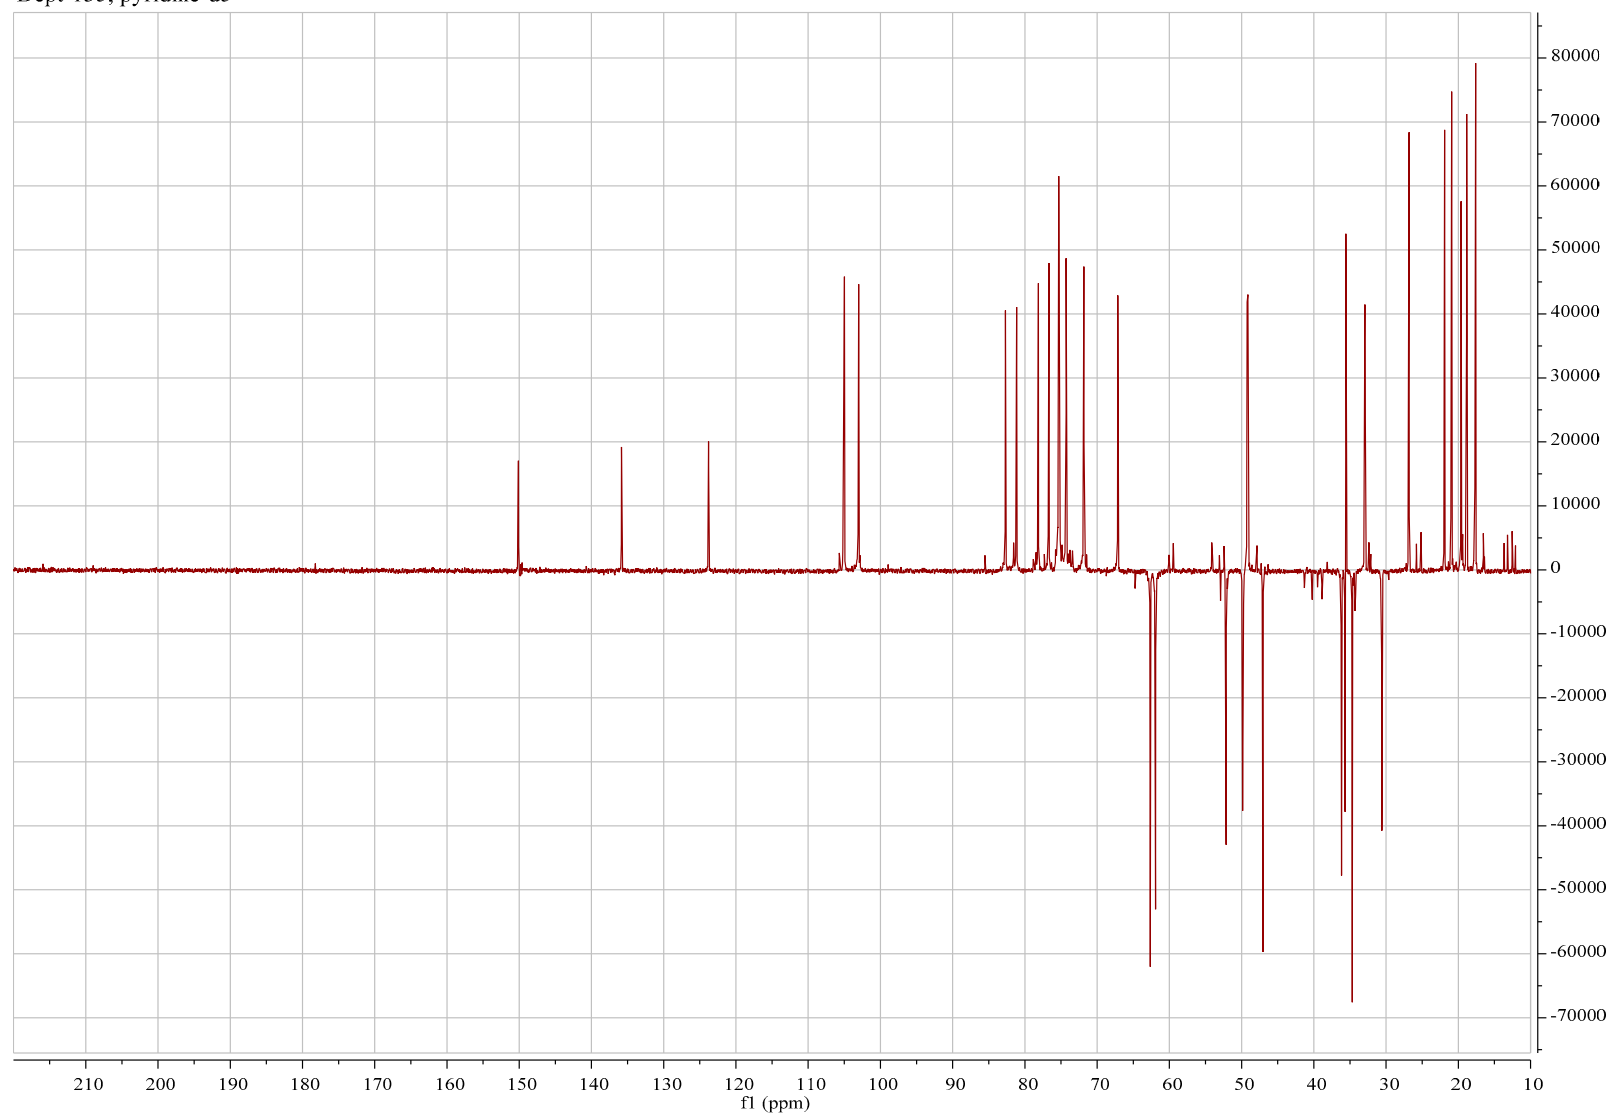

**Figure S9.** The DEPT-135 (176 MHz) spectrum of GAA-G2 in pyridined-5.

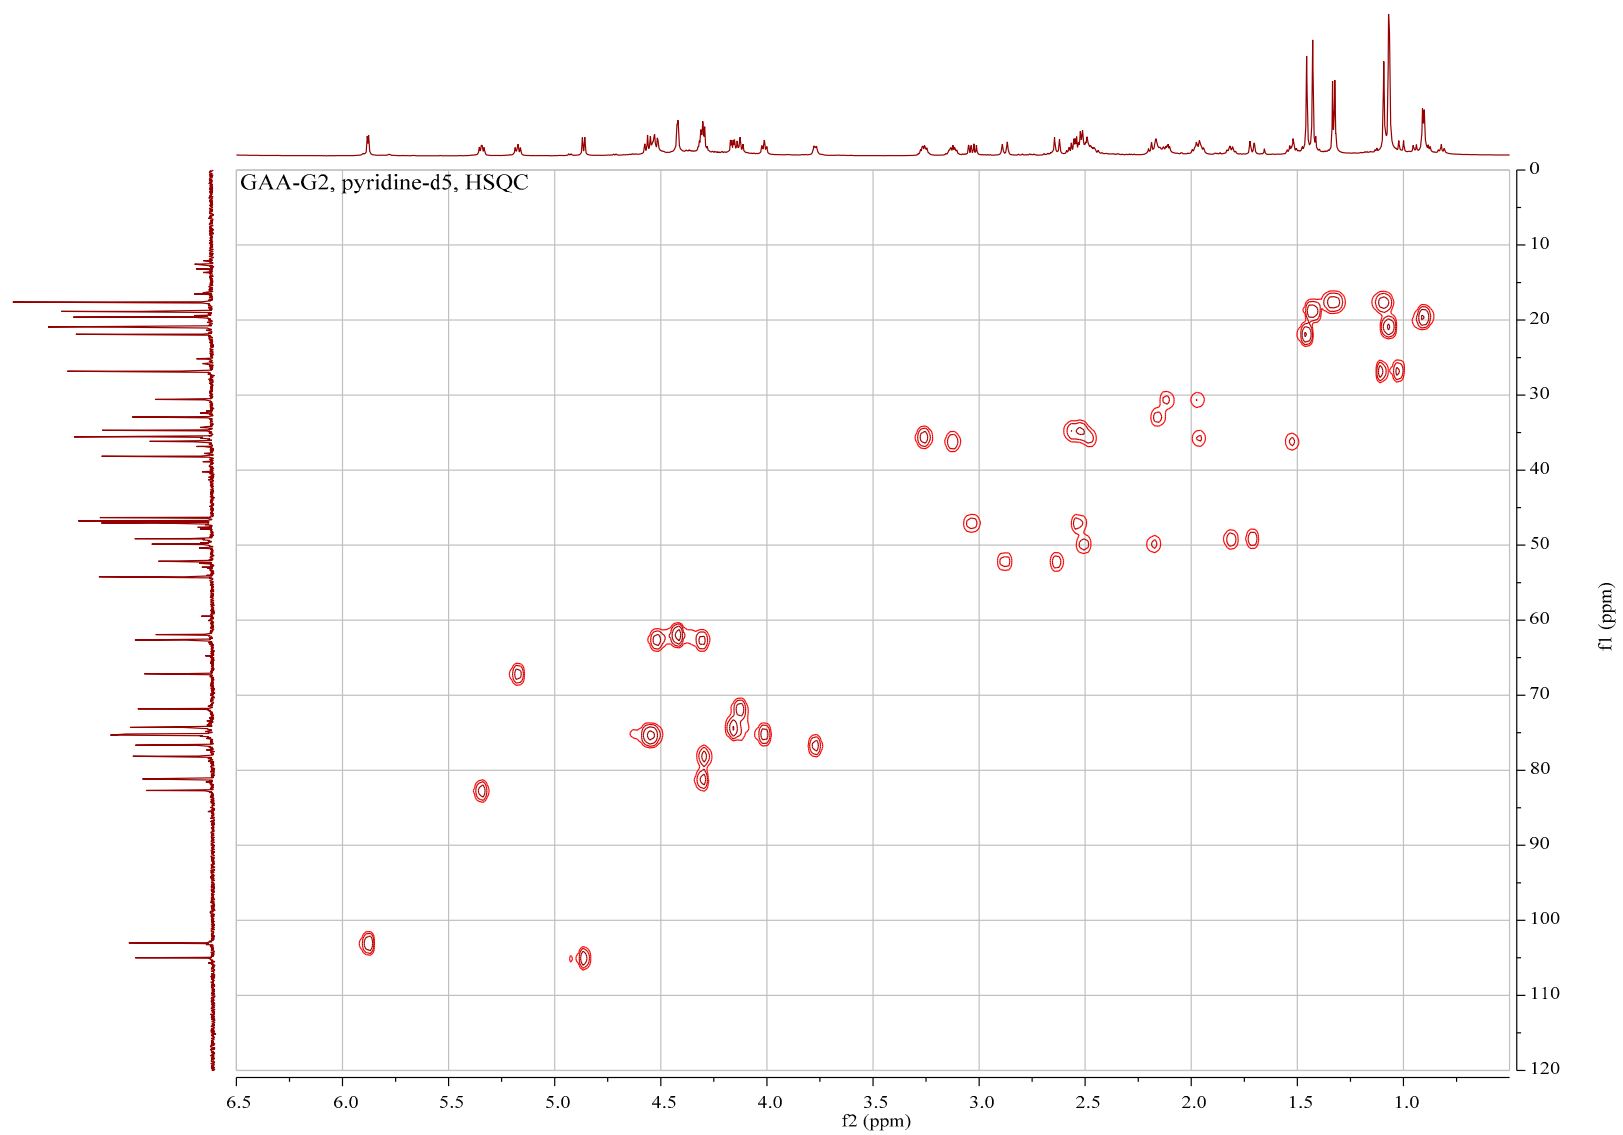

**Figure S10.** The HSQC (700 MHz) spectrum of GAA-G2 in pyridine-d<sub>5</sub>.

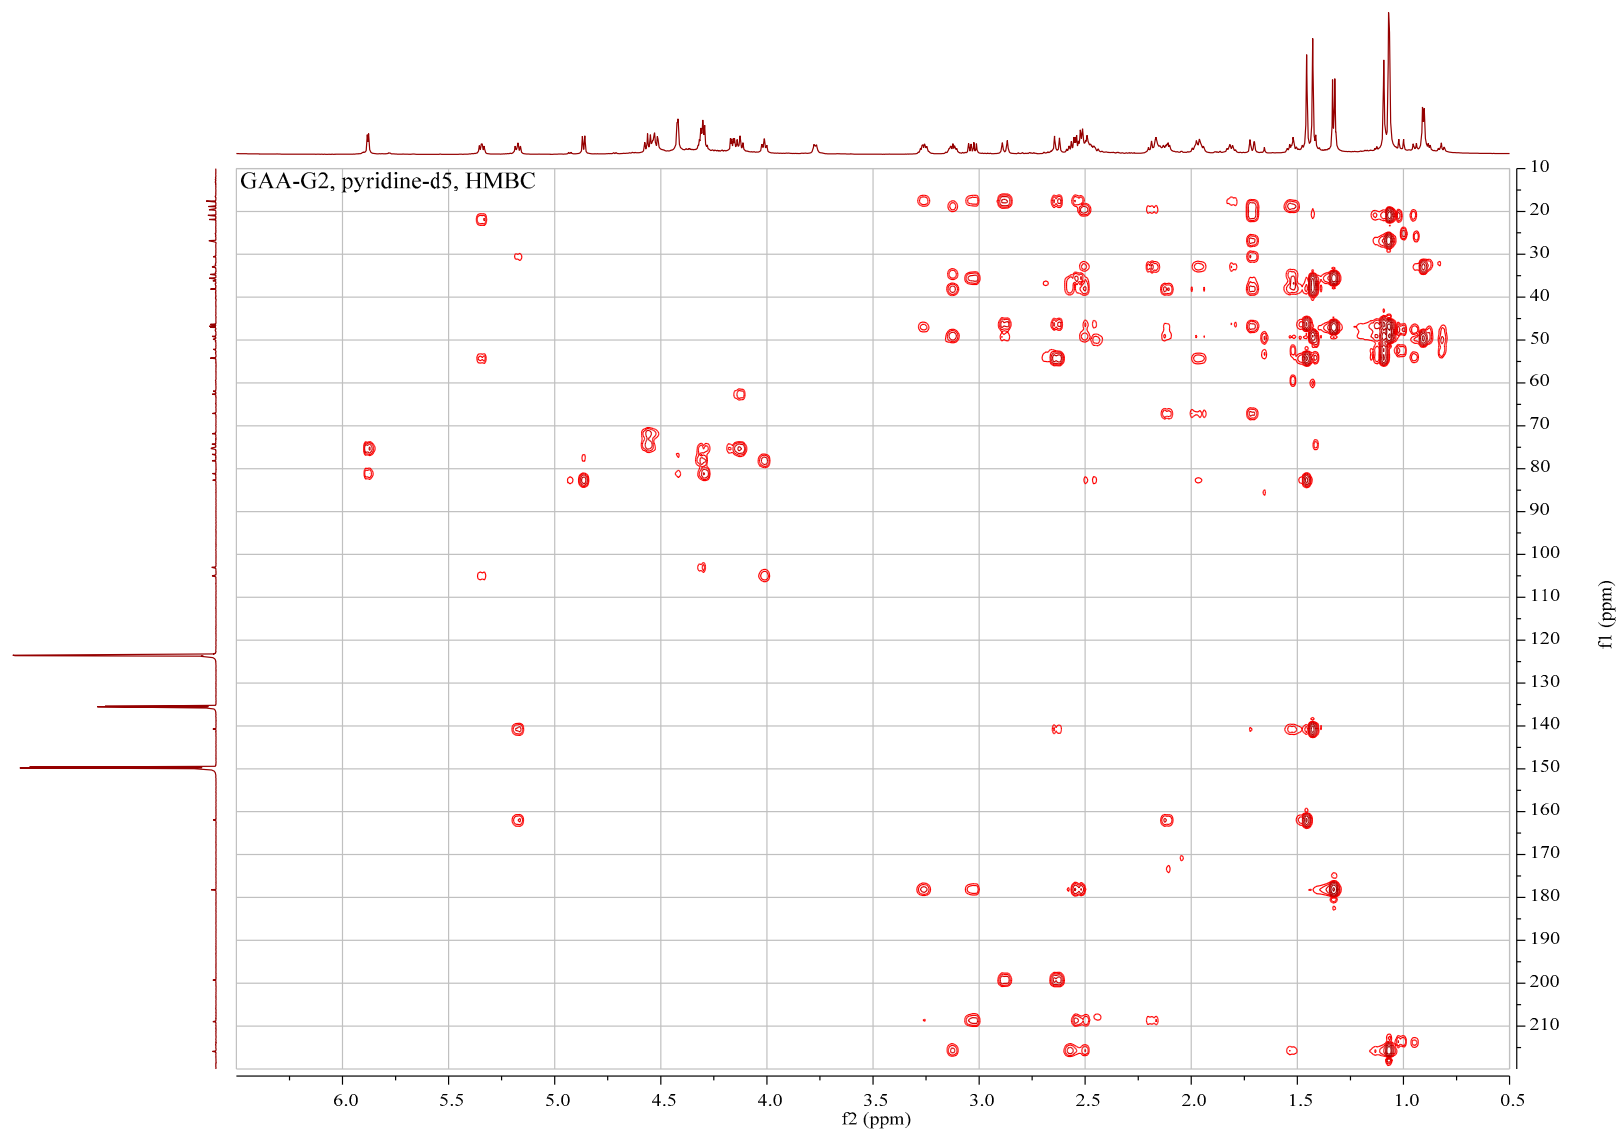

**Figure S11.** The HMBC (700 MHz) spectrum of GAA-G2 in pyridine-d<sub>5</sub>.

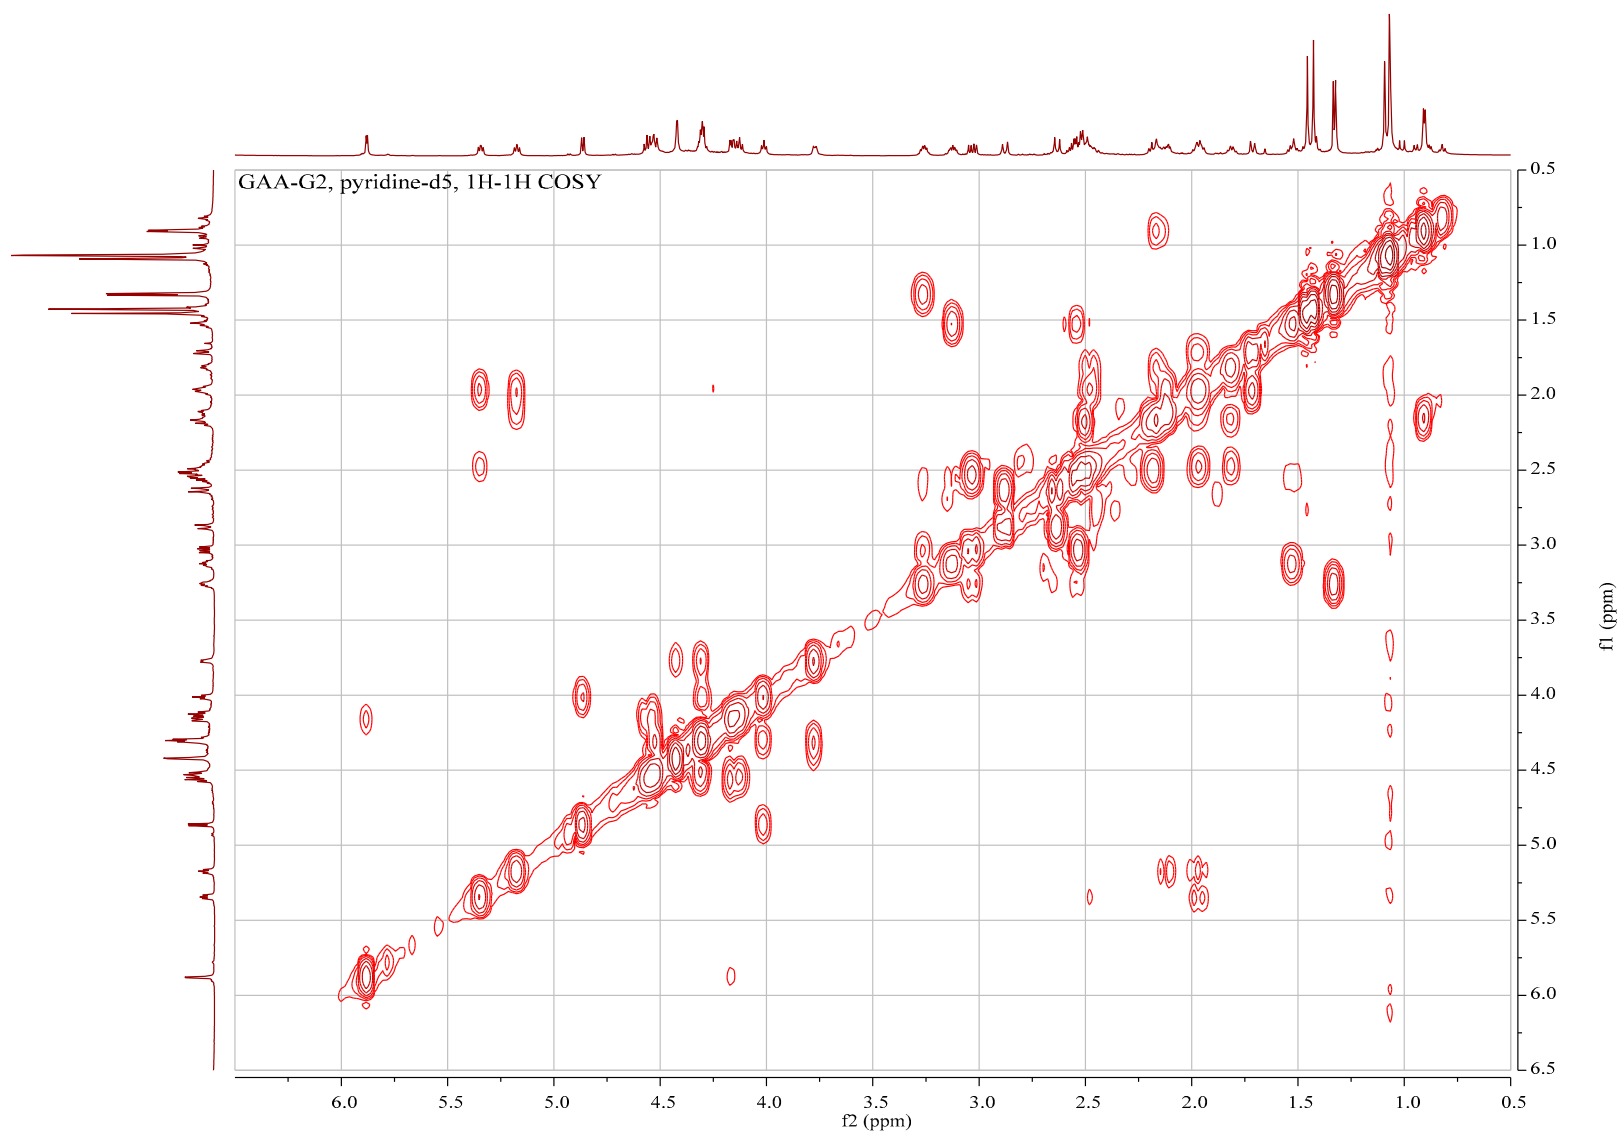

**Figure S12.** The <sup>1</sup>H-<sup>1</sup>H COSY (700 MHz) spectrum of GAA-G2 in pyridine-d<sub>5</sub>.

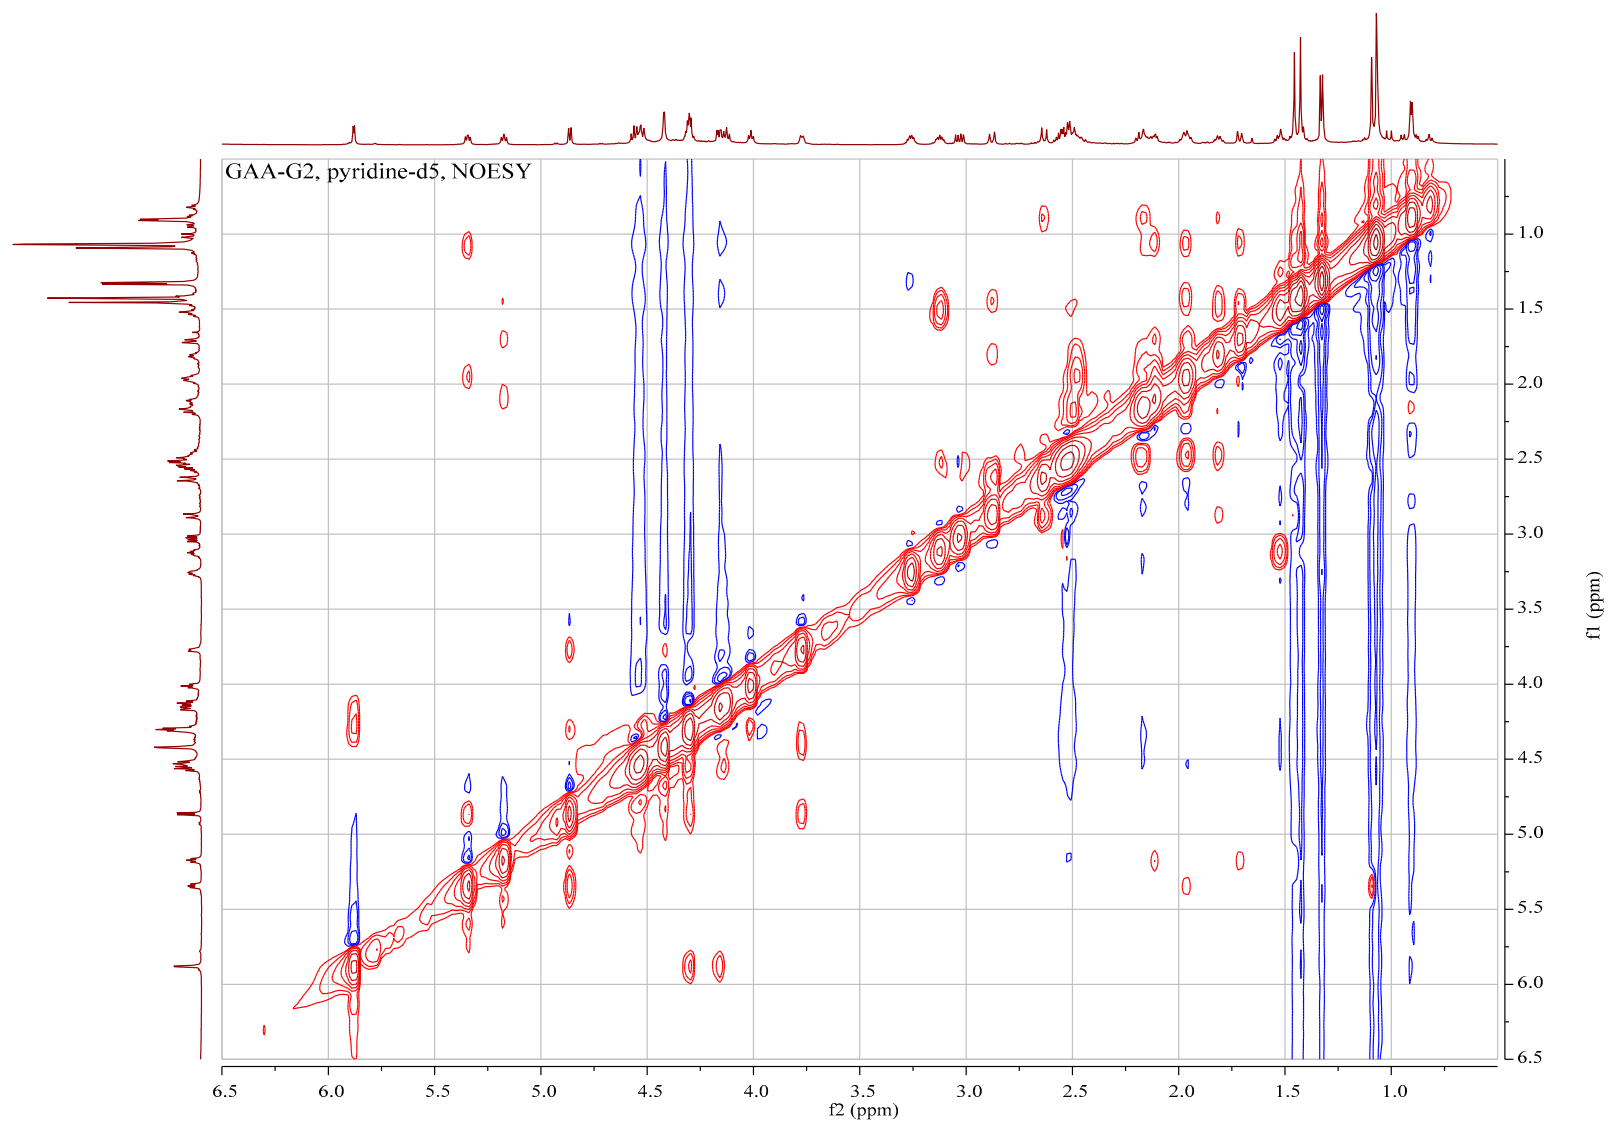

**Figure S13.** The NOESY (700 MHz) spectrum of GAA-G2 in pyridine-d<sub>5</sub>.
